# Supplementary material for: Trends in hydroclimate extremes: How changes in winter conditions affect seasonal baseflow and storage
Source: Copernicus journal article supplement (doi:10.5194/hess-2024-337), 2024-12-03
Supplement: Supplementary file 1 [file hess-2024-337-supplement.pdf]

Supplementary Information for

**Trends in hydroclimate extremes: How changes in winter conditions affect seasonal baseflow and storage**

Tejshree Tiwari<sup>1</sup>, Hjalmar Laudon<sup>1</sup>

5 <sup>1</sup>Department of Forest Ecology and Management, Swedish University of Agricultural Sciences, SE-901 83 Umea, Sweden  
*Correspondence to:* Tejshree Tiwari (Tejshree.Tiwari@slu.se)

Content of this File

10

Tables

1. Table S1 Extreme Climate indices used in the analysis of 30 years of climate data from 1992-2022 showing the significant indices during the winter and summer
- 15 2. Table S2 Average annual temperature (T), Total precipitation (P mm day<sup>-1</sup>) and Total runoff (Q mm day<sup>-1</sup>) from the Krycklan catchment showing variability using standard deviation (std) and annual average minimum (Tmin) and maximum (Tmax) temperatures.

Figures

- 20 1. Figure. S1 Variability in average daily temperature (blue), average minimum temperature (orange), and average maximum temperature (purple) in the data set from C7 Krycklan catchment from 1982 to 2022
2. Figure. S2 Variability in daily precipitation (A) and runoff (B) and the variability in annual values for precipitation (C) and runoff (D) in the Svartberget catchment
3. Figure. S3 Annual air temperature showing the isolation of the winter period using the consecutive days below zero threshold.
4. Figure. S4 Trends in winter and summer precipitation across the seasons from 1982-2022
- 25 5. Figure. S5 The extreme climate indices during the winter (purple) and summer (green) that showed significant trends over the 30 years from 1992-2022

30

Table S1 Extreme Climate indices used in the analysis of 30 years of climate data from 1992-2022 showing the significant indices during the winter and summer

| Extreme Climate Indices            | Unit                 | Winter                       | Summer                      |
|------------------------------------|----------------------|------------------------------|-----------------------------|
| TA                                 | o C                  |                              |                             |
| Tmin                               | o C                  | r <sup>2</sup> =0.51 p<0.01  |                             |
| Tmax                               | o C                  |                              |                             |
| <b>Intensity</b>                   |                      |                              |                             |
| Min Tmax                           | o C                  |                              |                             |
| Min Tmin                           | o C                  |                              |                             |
| Max Tmax                           | o C                  |                              | r <sup>2</sup> =0.48 p<0.01 |
| Max Tmin                           | o C                  |                              |                             |
| Diurnal temperature range          | o C                  | r <sup>2</sup> =0.44 p<0.01  |                             |
| AFDD <0                            | o C                  | r <sup>2</sup> =0.5 p<0.01   |                             |
| Freeze thaw days (Tmax >0 Tmin <0) | Days                 |                              |                             |
| <b>Duration</b>                    |                      |                              |                             |
| Growing season length              | Days                 | r <sup>2</sup> =0.32 p=0.08  |                             |
| Cold spell duration indicator      | Days                 | r <sup>2</sup> =0.34 p=0.06  |                             |
| Warm spell duration indicator      | Days                 |                              |                             |
| <b>Frequency</b>                   |                      |                              |                             |
| Cool days                          | %Days                |                              |                             |
| Cool nights                        | %Days                | r <sup>2</sup> =-0.42 p=0.02 |                             |
| Warm days                          | %Days                |                              | r <sup>2</sup> =0.33 p=0.07 |
| Warm nights                        | %Days                |                              | r <sup>2</sup> =0.33 p=0.17 |
| Frost days                         | Days                 | r <sup>2</sup> =-0.47 p<0.01 |                             |
| Icing days                         | Days                 |                              |                             |
| <b>Precipitation</b>               |                      |                              |                             |
| Intensity                          |                      |                              |                             |
| Max 1-day precipitation            | mm                   |                              |                             |
| Max 5-day precipitation            | mm                   |                              |                             |
| Simple daily intensity index       | mm                   |                              |                             |
| Contribution from very wet days    | mm                   |                              |                             |
| Contribution from wet days         | mm                   |                              |                             |
| <b>Duration</b>                    |                      |                              |                             |
| Consecutive wet days               | Days                 |                              |                             |
| Consecutive dry days               | Days                 |                              |                             |
| <b>Frequency</b>                   |                      |                              |                             |
| Heavy precipitation days           | Days                 |                              |                             |
| Very heavy precipitation days      | Days                 |                              |                             |
| Total snow days                    | Days                 | r <sup>2</sup> =-0.55 p<0.01 |                             |
| <b>Runoff</b>                      |                      |                              |                             |
| Winter Qmin                        | Mm day <sup>-1</sup> |                              |                             |
| Spring Qmin                        | Mm day <sup>-1</sup> |                              |                             |
| Summer Qmin                        | Mm day <sup>-1</sup> |                              |                             |

35

40

Table S2 Average annual temperature (T), Total precipitation (P mm yr<sup>-1</sup>) and Total runoff (Q mm yr<sup>-1</sup>) from the Krycklan catchment showing variability using standard deviation (std) and annual average minimum (Tmin) and maximum (Tmax) temperatures.

| Year | T    | P      | Q     | Std T | Std P | Std Q | Tmin | Tmax |
|------|------|--------|-------|-------|-------|-------|------|------|
| 1982 | 1.6  | 1018.5 | 387.6 | 8.7   | 39.5  | 1.4   |      |      |
| 1983 | 1.5  | 603.1  | 328.7 | 9.1   | 40.9  | 1.5   |      |      |
| 1984 | 1.8  | 600.9  | 317.8 | 9.2   | 24.2  | 1.6   |      |      |
| 1985 | -1.5 | 718.2  | 258.6 | 12.2  | 33.8  | 1.3   |      |      |
| 1986 | 0.9  | 685.3  | 353.5 | 10.1  | 45.9  | 1.8   |      |      |
| 1987 | -0.5 | 681.2  | 360.8 | 10.1  | 27.3  | 1.9   |      |      |
| 1988 | 0.9  | 588    | 371.5 | 9.7   | 63.7  | 1.5   |      |      |
| 1989 | 3    | 553.5  | 398.1 | 7.8   | 36.3  | 2.2   |      |      |
| 1990 | 2.2  | 634.7  | 282.7 | 7.4   | 24.4  | 1.7   |      |      |
| 1991 | 1.9  | 536.8  | 305.5 | 8.5   | 27.6  | 1.3   | -2.9 | 6    |
| 1992 | 2.3  | 648.8  | 273.5 | 7.8   | 29.8  | 1.0   | -2.8 | 6.5  |
| 1993 | 1.6  | 710.6  | 260.0 | 7.5   | 29.7  | 1.2   | -3.3 | 5.8  |
| 1994 | 1.2  | 446.1  | 427.3 | 9.8   | 41    | 1.8   | -4.1 | 6    |
| 1995 | 1.9  | 549.5  | 267.7 | 8.6   | 55.5  | 1.7   | -3.2 | 6.2  |
| 1996 | 1.2  | 553.3  | 297.1 | 9.3   | 9.1   | 2.0   | -4   | 5.9  |
| 1997 | 2.5  | 513.7  | 130.6 | 8.9   | 40.4  | 0.5   | -2.7 | 6.9  |
| 1998 | 1.5  | 846.8  | 216.8 | 8.4   | 44.6  | 1.6   | -3.1 | 5.6  |
| 1999 | 2.2  | 549.1  | 507.5 | 9.2   | 33.4  | 2.0   | -2.8 | 7    |
| 2000 | 3.3  | 827.5  | 253.2 | 7.7   | 39.8  | 1.3   | -1.7 | 7.7  |
| 2001 | 1.8  | 824.9  | 588.9 | 9.5   | 38.7  | 1.8   | -3.4 | 6.6  |
| 2002 | 2.5  | 470    | 534.3 | 10.1  | 28.7  | 2.2   | -3.2 | 7.4  |
| 2003 | 2.5  | 597.4  | 225.5 | 9.4   | 18.3  | 1.2   | -3.1 | 7.7  |
| 2004 | 2.2  | 643.5  | 246.5 | 8.5   | 27.2  | 1.1   | -2.8 | 6.7  |
| 2005 | 2.9  | 581.2  | 346.1 | 8.4   | 19.7  | 1.2   | -2.4 | 7.6  |
| 2006 | 3.1  | 628.1  | 248.7 | 9.3   | 25.3  | 0.8   | -2   | 7.7  |
| 2007 | 2.8  | 562.5  | 291.0 | 8.7   | 18.9  | 1.2   | -2.6 | 7.5  |
| 2008 | 2.9  | 658.6  | 259.3 | 7.1   | 29.7  | 0.8   | -2   | 7    |
| 2009 | 2.1  | 665.7  | 345.4 | 9.3   | 27.5  | 1.6   | -2.4 | 6.3  |
| 2010 | 0.6  | 612.5  | 327.0 | 11    | 27.6  | 1.4   | -4.2 | 4.8  |
| 2011 | 3.6  | 645.6  | 285.9 | 9.2   | 19.8  | 1.3   | -1.2 | 7.8  |
| 2012 | 2    | 828.9  | 263.3 | 8.5   | 44.8  | 0.9   | -2.7 | 5.4  |
| 2013 | 3.2  | 647.2  | 483.8 | 9     | 23.8  | 1.7   | -1   | 8.6  |
| 2014 | 3.7  | 583.5  | 293.1 | 8.3   | 16.7  | 1.2   | -0.8 | 7.7  |
| 2015 | 3.6  | 680.4  | 278.0 | 7.1   | 28.4  | 0.9   | -0.7 | 7.8  |
| 2016 | 2.6  | 609.9  | 325.2 | 8.9   | 26.7  | 1.2   | -2.1 | 7.1  |
| 2017 | 2.3  | 731.6  | 262.9 | 7.7   | 27.4  | 1.2   | -2.1 | 6.7  |
| 2018 | 2.9  | 543.7  | 304.5 | 10.1  | 35.2  | 1.3   | -2.4 | 7.9  |
| 2019 | 2.3  | 616.7  | 241.8 | 8.9   | 28    | 1.5   | -2.6 | 7.2  |
| 2020 | 4.1  | 794.9  | 234.6 | 7.3   | 32.6  | 1.3   | -0.5 | 8.8  |
| 2021 | 2.2  | 764.8  | 392.9 | 9.7   | 34.7  | 1.5   | -2.5 | 6.9  |
| 2022 | 3.2  | 639.3  | 429.8 | 8.6   | 15    | 1.5   | -1.7 | 8    |

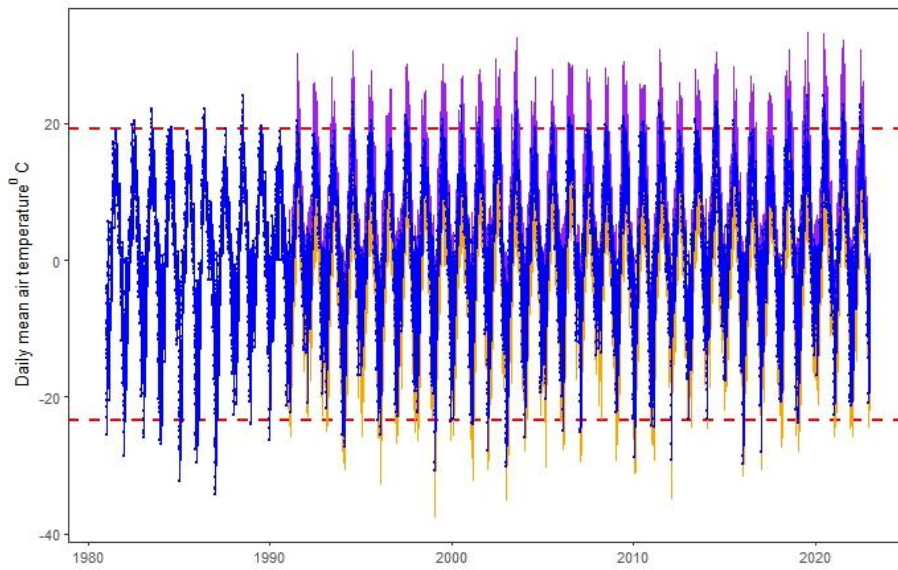

**Figure S1** Variability in average daily temperature (blue), average minimum temperature (orange), and average maximum temperature (purple) in the data set from C7 Krycklan catchment from 1982 to 2022

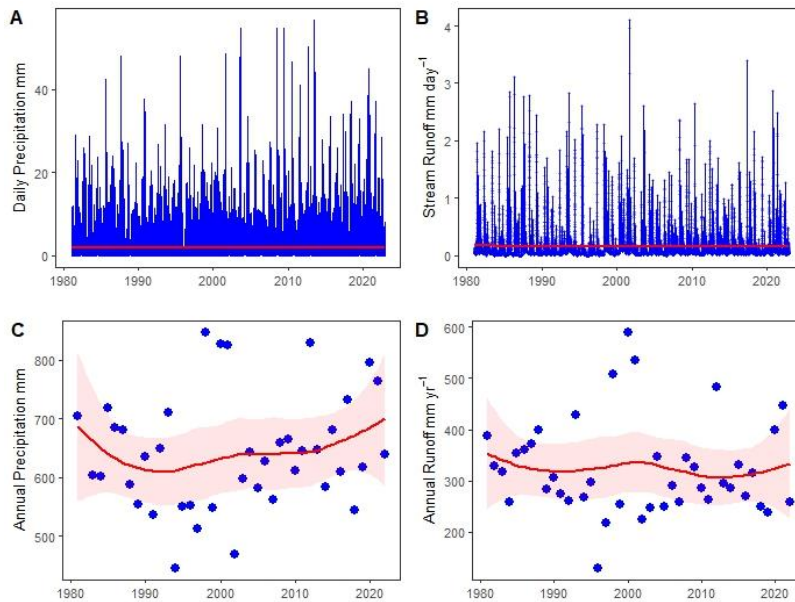

50

**Figure S2** Variability in daily precipitation (A) and runoff (B) and the variability in annual values for precipitation (C) and runoff (D) in the Svartberget catchment

55

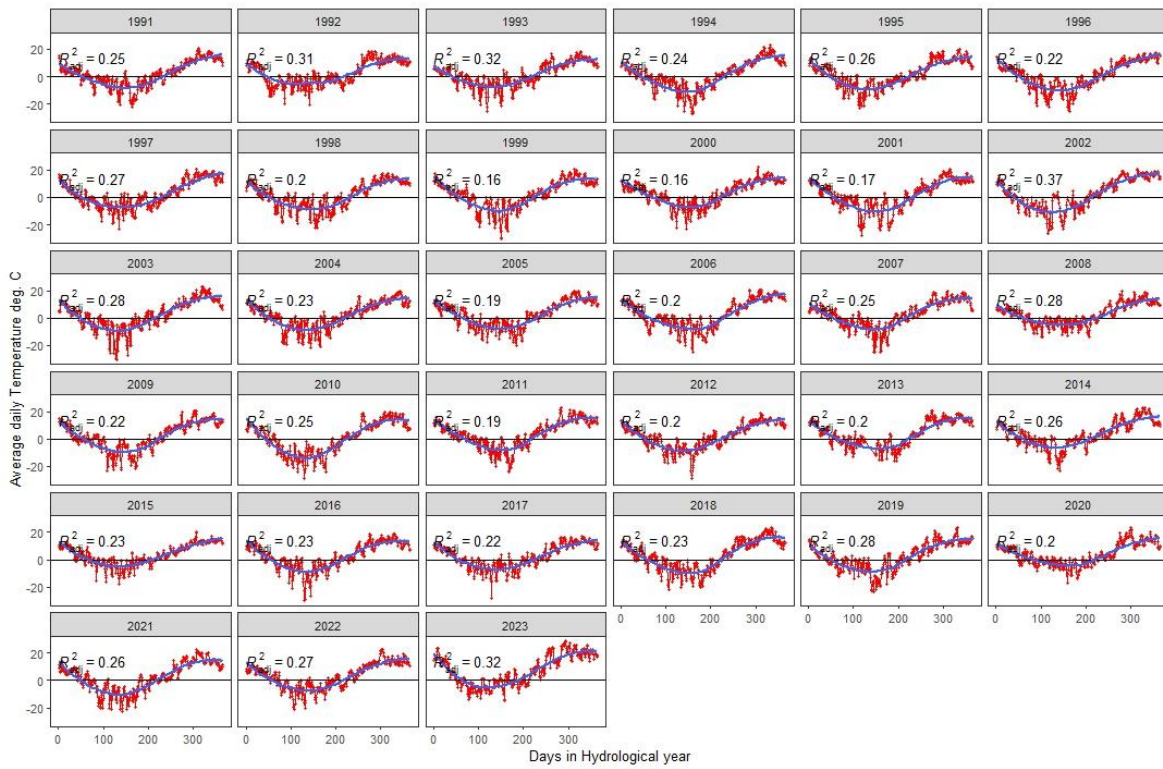

Figure S3 Annual air temperature showing the isolation of the winter period using the consecutive days below zero threshold.

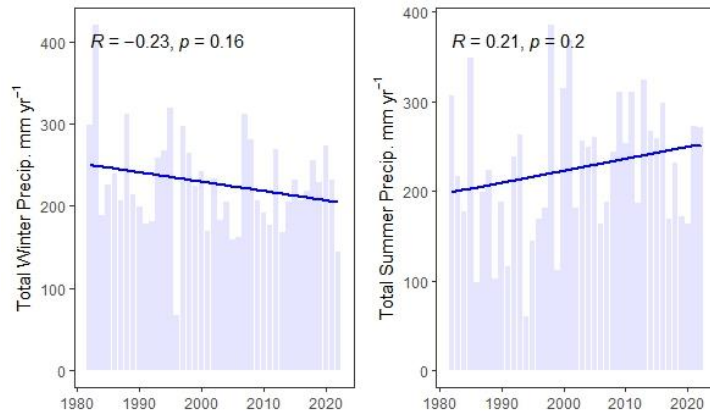

Figure S4 Trends in winter and summer precipitation across the seasons from 1982-2022

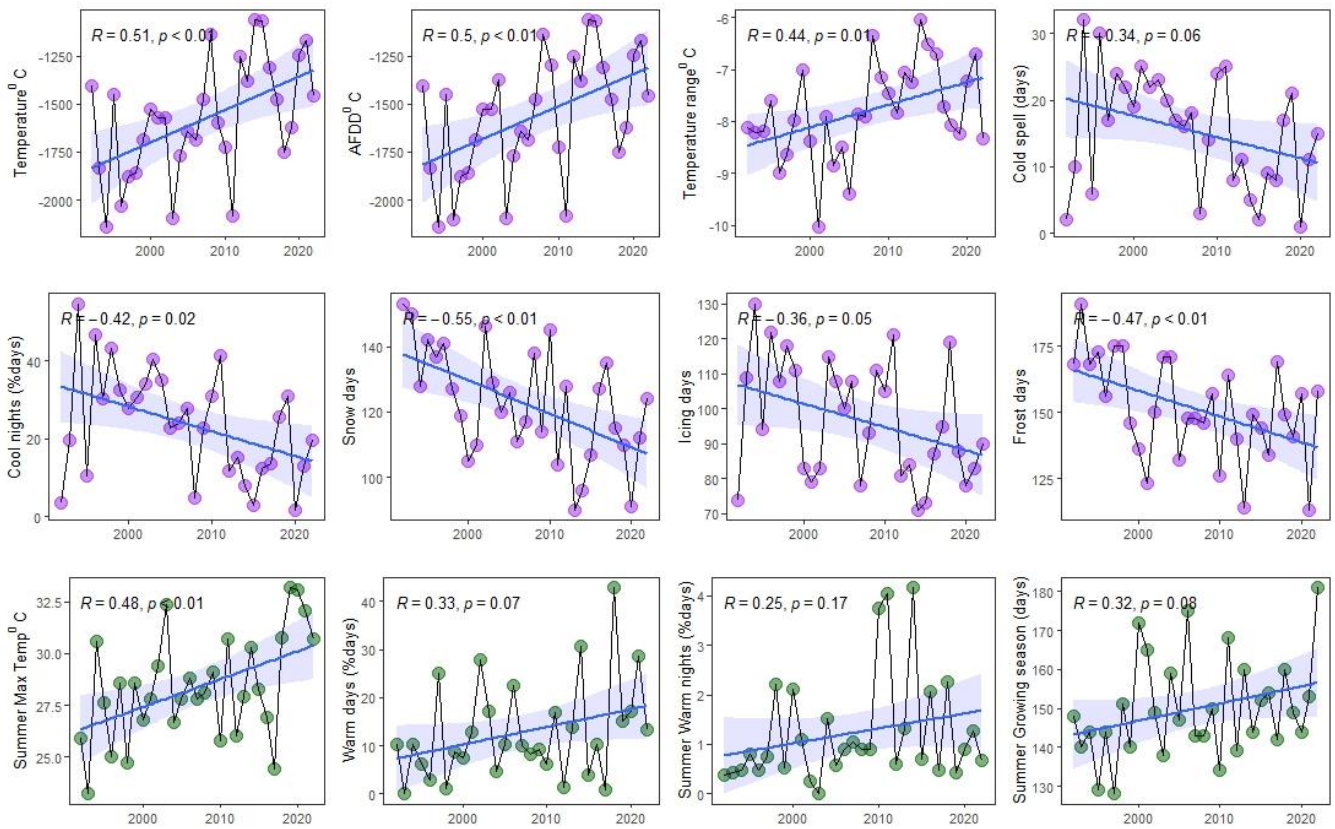

**Figure S5** The extreme climate indices during the winter (purple) and summer (green) that showed significant trends over the 30 years from 1992-2022
